# Supplementary material
Source: PubMed Central journal article supplement (PMC8020780)

Fig S1. Correlation of ER $\beta$  and PTEN in prostate cancer. In ER $\beta$  nuclear-positive cancer (A), PTEN was expressed in cell nuclei (B). In cancer when ER $\beta$  was cytosolic (C), PTEN was expressed in cytoplasm (D). In cancer when ER $\beta$  was lost (E), PTEN expression was also lost (F). ER $\beta$  and PTEN double fluorescent staining showed that there was co-localization of ER $\beta$  (red), PTEN (green) and DAPI (blue) (white arrow) (G-J). A close-up view of a co-localization has been inserted in I and J. (Scale bars in A-F, 50  $\mu$ m; G-J: 200  $\mu$ m)

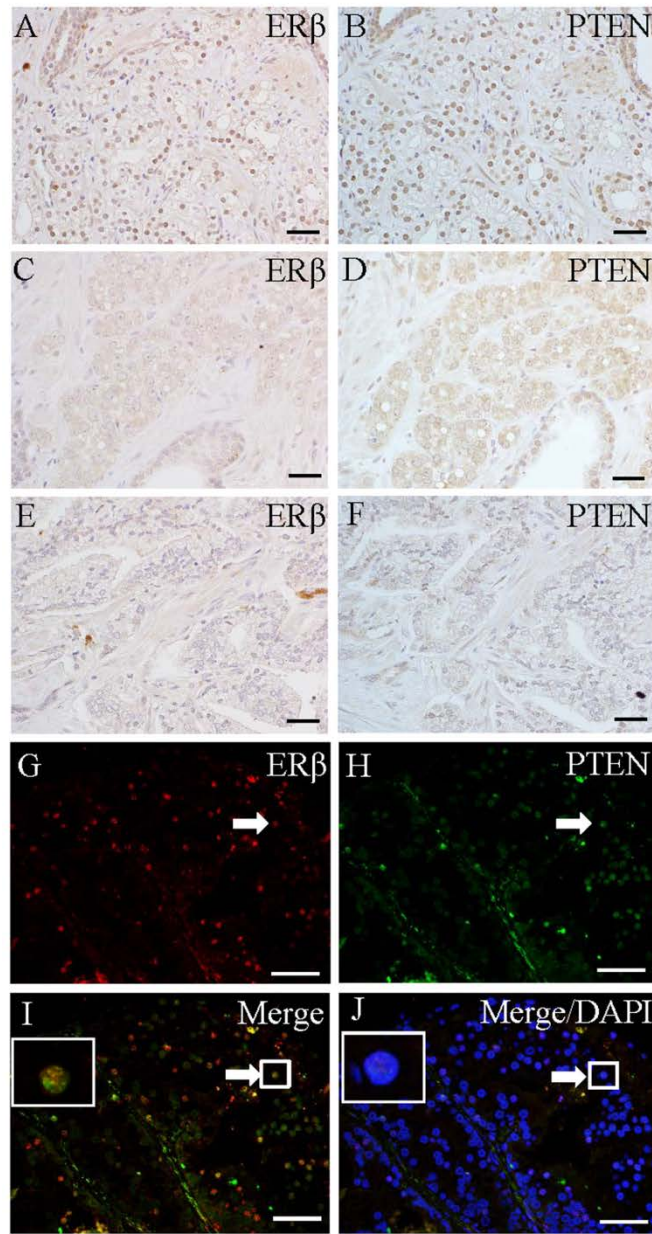

Fig S2. EGFR nuclear translocation promoted PCNA expression in ADT- treated cancer. In relatively normal ducts in the biopsy of Gleason Grade 4 cancer, few cells in EGFR-nuclear-negative ducts expressed PCNA (A, B). Many more cells expressed PCNA in EGFR-nuclear-positive ducts (C, D). In EGFR-nuclear-positive ducts, PCNA expression was significantly increased (\*  $P < 0.05$ ) (E). (Scale bars in A, C, 200  $\mu\text{m}$ ; B, D, 50  $\mu\text{m}$ )

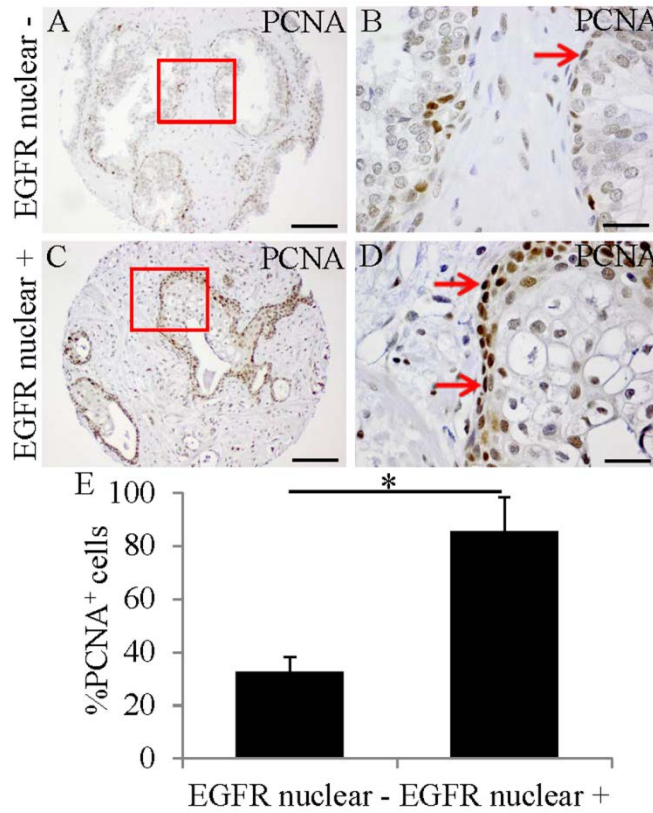

Supplement: pnas.2011269118.sapp.pdf [file pnas.2011269118.sapp.pdf]
